# Supplementary material for: A wheat PI4K gene whose product possesses threonine autophophorylation activity confers tolerance to drought and salt in Arabidopsis
Source: PubMed Central journal article supplement — J Exp Bot. 2013 May 16;64(10):2915–27. doi: 10.1093/jxb/ert133 (PMC3741686; doi:10.1093/jxb/ert133), 2013-05-16
Supplement: supp_ert133_jexbot098467_file001.pdf [file supp_ert133_jexbot098467_file001.pdf]

Figure S1. The information of *ubdky7* mutant. (A) The *ubdky7* mutant is a T-DNA insertion line. The insertion site is in the promoter (about -500 bp). (B) *ubdky7* mutant was a knock out line. *UDDK $\gamma$ 7* was expressed in Col-0, but not in *ubdky7* mutant. (C) The expression pattern of At1g13640 was identified in root (R), stem (S), flower (F) and leaf (L). The At1g13640 was found expressed in all the tissues tested.

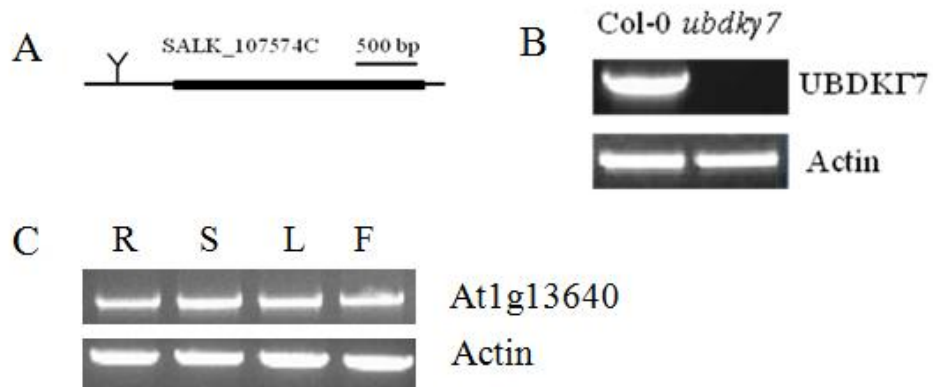

Fig S2 All PI3/4K domain-containing proteins identified in Arabidopsis (At), Humans (Hs) and Yeast (Sc) were selected for analysis. The different entries are identified by locus (Arabidopsis), gene product name or protein accession number according to UniProt/Swiss-Prot (<http://www.pir.uniprot.org/index.shtml>) (human and yeast). The clustering pattern separated the four major groups of PI3/4K domain-containing enzymes: PI kinase-like kinases (PIKK), type III PI4K, VPS-like PI3K and type II PI4Ks. The wheat PI4K cloned in this study clustered with the type II PI4K group. Accessions for the sequences identified by gene product were: *Saccharomyces cerevisiae* P38110 (ScTEL1), P38111 (ScMEC1), P22543 (ScVPS34), P38811 (ScTRA1), P39104 (ScPIK1), P37297 (ScSTT4), P35169 (ScTOR1), and P42951 (ScLSB6); *Homo sapiens* P42356 (HsPI4KA), Q13315 (HsATM), Q13535 (HsATR), Q9Y4A5 (HsTRRAP), P42345 (HsFRAP), and Q9Y4A5 (HsTRRAP); *Mus musculus* D78355.1 (MmTRA1).

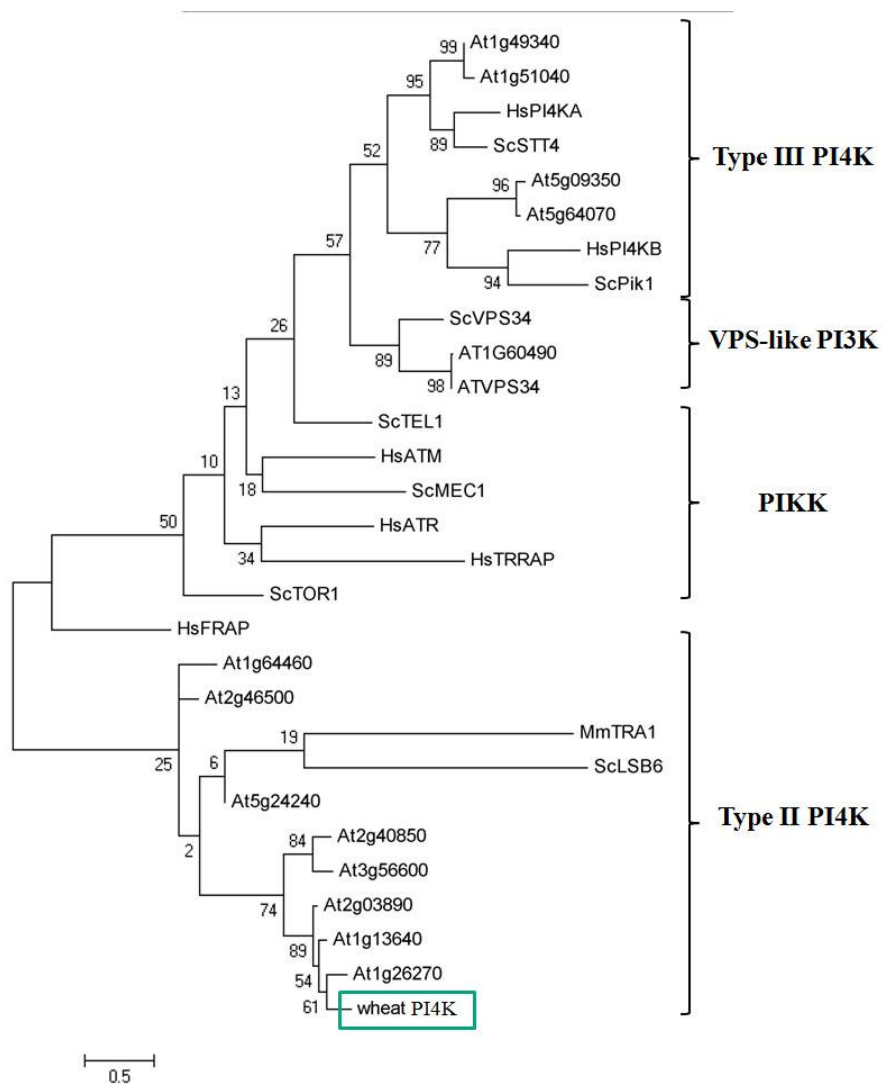

Figure S3. Expression profiles of *TaPI4KII $\gamma$*  under salicylic acid (SA) treatment for 1, 0.5, 1, 3, 6, 12, 24 and 48 h. *TaPI4KII $\gamma$*  was down-regulated by SA treatment. The expression of *TaPI4KII $\gamma$*  decreased rapidly by 0.5 h, but recovered to the normal expression level at 48 h.

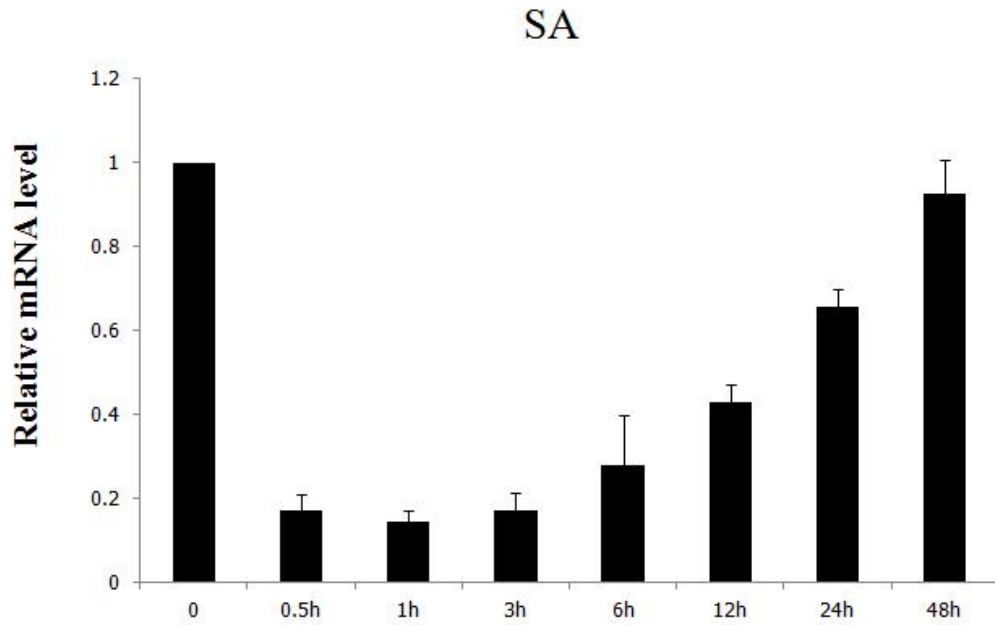

Table S1 stress-response genes selected from the TAIR database, and gene-specific primers used for qRT PCR.

| Genes                    | Forwards primers        | Reverse primers        |
|--------------------------|-------------------------|------------------------|
| <i>CBF3</i>              | AGAACCAAACAAGAAAACAAGGA | AAGCCGAGTCAGCGAAATT    |
| <i>ZAT12</i>             | GTCACAAGAAGCCTAACAACGA  | ACTCAGATCCAAACAAGCCAC  |
| <i>COR15A</i>            | ACTCAGTTCGTCGTCGTTTCT   | CTTCTTTTCCTTTCTCCTCCAC |
| <i>COR47</i>             | ACGGATCGTGGATTGTTTGA    | AAGAGCTGTTGGATCGGTGA   |
| <i>LTI78</i>             | CTCTTTGCTGTTCTTCTCGTCG  | TTTCTCCATTGTCACCGTAG   |
| <i>Arabidopsis actin</i> | AAGCAATGAGCATGAGCAAG    | GGAAGACACGACAGGAAACAC  |
| <i>TaPI4KIIγ</i>         | GTGTTGAACAAGGAGAGGACAT  | AAGCTCCTGGAAGTTCTCGATG |
| wheat <i>actin</i>       | CTCCCTCACAACAACCGC      | TACCAGGAACTTCCATACCAAC |
